# Supplementary material
Source: Springer Nature journal article supplement (https://www.springermedizin.de/resource/supplementary/12876_2012_842_MOESM3_ESM.pdf/9437594)

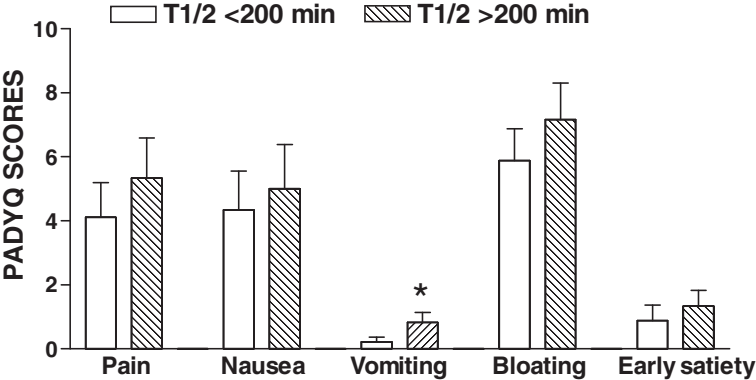

Supplement: MOESM3 [file 9437594]
